# Supplementary material for: Ultra-high thermally stable gold nanorods/radial mesoporous silica and their application in enhanced chemo-photothermal therapy
Source: Royal Society of Chemistry journal article supplement (doi:10.1039/d1ra00213a), 2021-01-01
Supplement: d1ra00213a1.pdf [file d1ra00213a1.pdf]

## Supporting Information

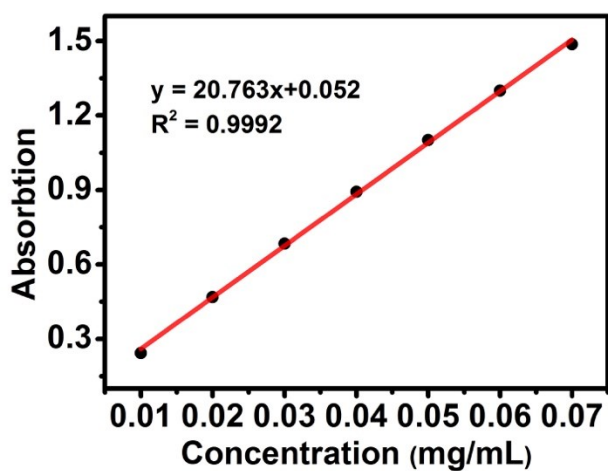

Fig. S1 DOX calibration curve with DOX standard solutions

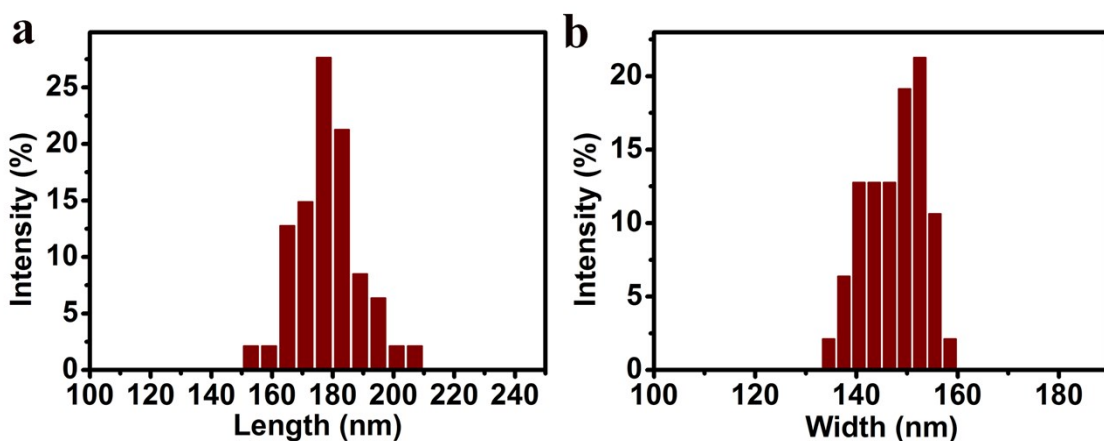

Fig. S2 Size distribution of AuNR/R-SiO<sub>2</sub> (a) Length, (b) Width.

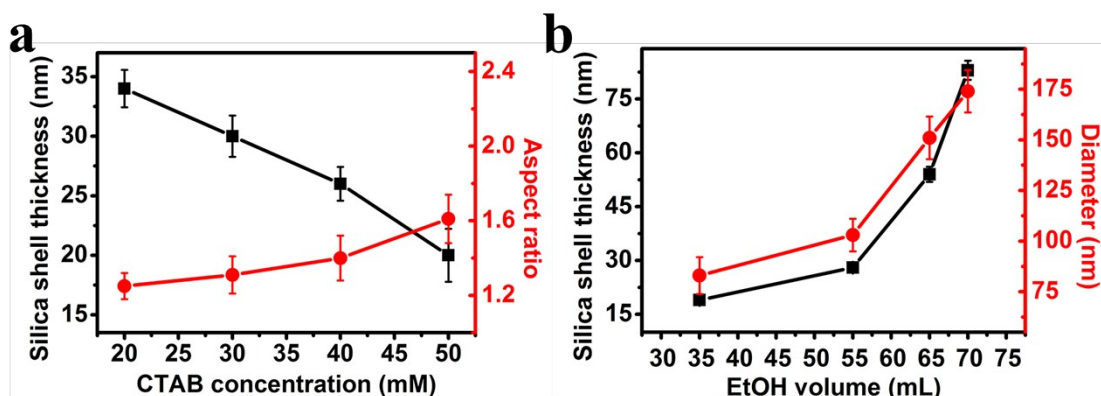

**Fig. S3** (a) Silica shell thickness and aspect ratio of AuNR/R-SiO<sub>2</sub> with different CTAB concentration (Volume of EtOH: 75 mL); (b) Silica shell thickness and diameter of AuNR/R-SiO<sub>2</sub> with different EtOH volume (Concentration of CTAB: 10mM)

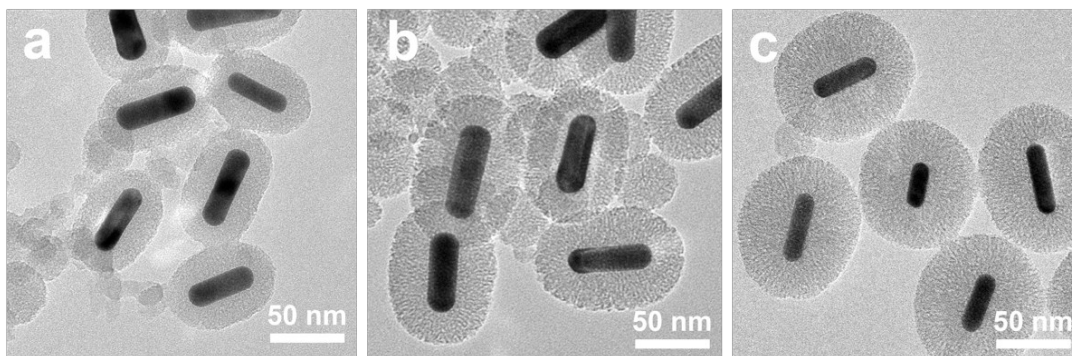

**Fig. S4** TEM images of AuNR/R-SiO<sub>2</sub> were collected under different volume of EtOH. (a) 35 mL; (b) 55 mL; and (c) 65 mL. Concentration of CTAB: 10 mM.

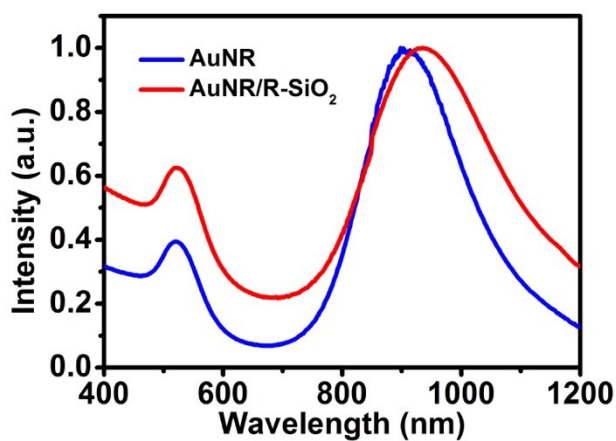

**Fig. S5** UV-vis-NIR absorption spectra of AuNR and AuNR/R-SiO<sub>2</sub>.

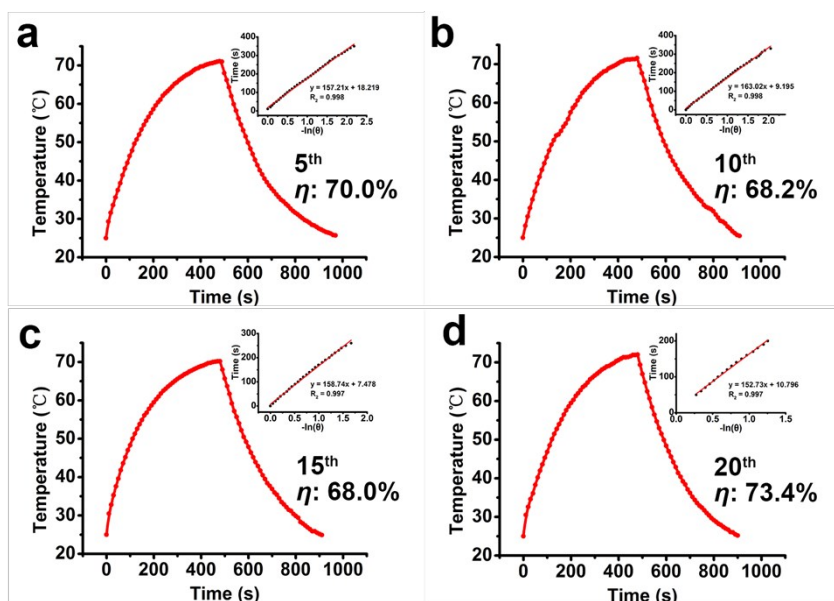

**Fig. S6** Temperature profile of AuNR/R-SiO<sub>2</sub> solution (250  $\mu$ g/mL) under 2.0 W/cm<sup>2</sup> 808 nm laser irradiation and corresponding linear time data vs  $-\ln(\theta)$  obtained from the cooling period

(inset).

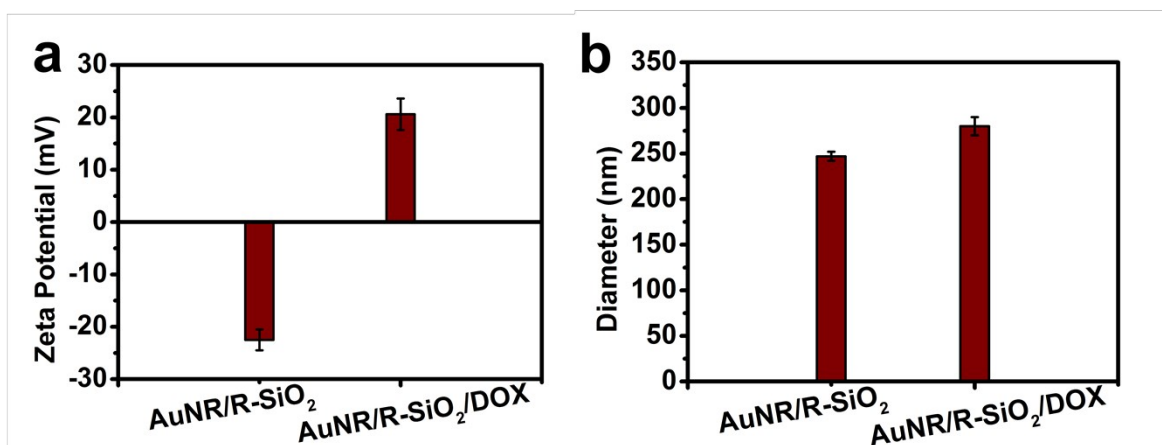

**Fig. S7** (a) Zeta potentials and (b) Hydrodynamic diameters of AuNR/R-SiO<sub>2</sub> and AuNR/R-SiO<sub>2</sub>/DOX

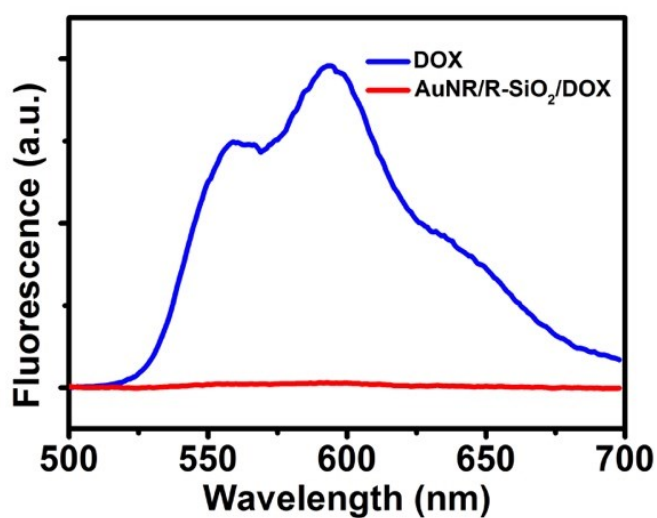

Fig. S8 Fluorescence intensities of DOX and AuNR/R-SiO<sub>2</sub> (with the equivalent DOX concentrations)

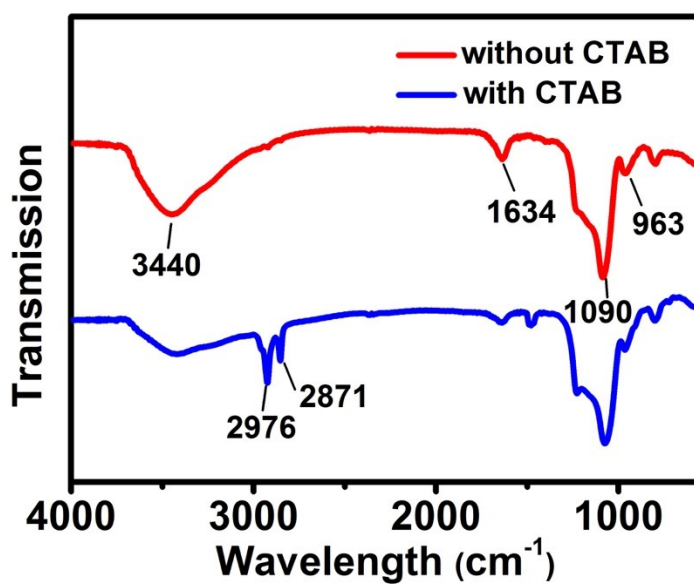

Fig. S9 FT-IR spectra of AuNR/R-SiO<sub>2</sub> before and after thermal annealing

Table S1. Dimensions of AuNR coated with ultra-thick silica shell before and after thermal annealing

| <b>Temperature (°C)</b> | <b>Length (nm)</b> | <b>Width (nm)</b> | <b>Aspect ratio</b> |
|-------------------------|--------------------|-------------------|---------------------|
| Control                 | 72.8 ± 7.6         | 13.4 ± 1.3        | 5.5 ± 0.5           |
| 400                     | 70.8 ± 8.3         | 14.6 ± 1.0        | 4.9 ± 0.5           |
| 500                     | 67.6 ± 4.4         | 15.4 ± 0.7        | 4.4 ± 0.1           |
| 600                     | 66.0 ± 4.9         | 15.5 ± 0.5        | 4.2 ± 0.3           |
| 700                     | 62.2 ± 7.4         | 15.6 ± 1.8        | 4.0 ± 0.1           |
| 800                     | 60.8 ± 6.4         | 16.0 ± 0.9        | 3.8 ± 0.6           |
